# Supplementary material
Source: PubMed Central journal article supplement (PMC4874405)
Supplement: rstb20150167supp1.pdf [file rstb20150167supp1.pdf]

Hardiman, M *et al.* 2016. Fire history on the California Channel Islands spanning human arrival in the Americas. *Phil. Trans. R. Soc. B* **371** doi: 10.1098/rstb.2015.0167

## **Supplementary information**

**SI Table 1 – Radiocarbon Dates used in this study**

| <b>ID Code</b> | <b>Publication code</b> |       | <b><sup>14</sup>C age (yr)</b> | <b>1-sigma age error (yr)</b> | <b>Sample Type</b>                  | <b>Reference</b>   |
|----------------|-------------------------|-------|--------------------------------|-------------------------------|-------------------------------------|--------------------|
| SRI-09-16a     | UCIAMS                  | 66947 | 10000                          | 25                            | charcoal                            | Scott et al (2010) |
| SRI-09-28      | UCIAMS                  | 66950 | 11020                          | 25                            | charred wood                        | Scott et al (2010) |
| SRI-09-75      | UCIAMS                  | 66952 | 13665                          | 35                            | charcoal                            | Scott et al (2010) |
| SRI-09-80      | UCIAMS                  | 66953 | 12840                          | 30                            | charcoal                            | Scott et al (2010) |
| SRI-09-82      | UCIAMS                  | 66954 | 11875                          | 30                            | charcoal                            | Scott et al (2010) |
| SRI-09-86      | UCIAMS                  | 66955 | 11765                          | 30                            | charcoal                            | Scott et al (2010) |
| SRI-09-88      | UCIAMS                  | 66956 | 11865                          | 25                            | charcoal                            | Scott et al (2010) |
| SRI-09-94      | UCIAMS                  | 66957 | 14010                          | 35                            | charcoal                            | <i>This Study</i>  |
| SRI-10-102     | UCIAMS                  | 84960 | 10580                          | 25                            | charred coprolites                  | <i>This Study</i>  |
| SRI-10-102     | UCIAMS                  | 84959 | 10575                          | 25                            | charcoal                            | <i>This Study</i>  |
| SRI-10-103     | UCIAMS                  | 84961 | 11270                          | 120                           | charred twigs                       | <i>This Study</i>  |
| SRI-10-14      | UCIAMS                  | 81563 | 15470                          | 60                            | charcoal                            | <i>This Study</i>  |
| SRI-10-17      | UCIAMS                  | 81564 | 12440                          | 35                            | charcoal                            | <i>This Study</i>  |
| SRI-10-18      | UCIAMS                  | 81565 | 14730                          | 40                            | charcoal                            | <i>This Study</i>  |
| SRI-10-24      | UCIAMS                  | 84937 | 10515                          | 25                            | charred twigs and wood              | <i>This Study</i>  |
| SRI-10-29      | UCIAMS                  | 84938 | 12805                          | 50                            | charred twigs                       | <i>This Study</i>  |
| SRI-10-37      | UCIAMS                  | 84940 | 10890                          | 25                            | charred twigs                       | <i>This Study</i>  |
| SRI-10-42      | UCIAMS                  | 84941 | 10850                          | 25                            | charcoal                            | <i>This Study</i>  |
| SRI-10-44      | UCIAMS                  | 84942 | 12300                          | 45                            | charcoal                            | <i>This Study</i>  |
| SRI-10-47      | UCIAMS                  | 84944 | 12310                          | 30                            | charred twigs                       | <i>This Study</i>  |
| SRI-10-47      | UCIAMS                  | 84943 | 11885                          | 30                            | charred coprolites                  | <i>This Study</i>  |
| SRI-10-48      | UCIAMS                  | 81566 | 12195                          | 45                            | charcoal                            | <i>This Study</i>  |
| SRI-10-5       | UCIAMS                  | 84935 | 11005                          | 40                            | charcoal                            | <i>This Study</i>  |
| SRI-10-52      | UCIAMS                  | 84945 | 11000                          | 25                            | charred twigs                       | <i>This Study</i>  |
| SRI-10-53      | UCIAMS                  | 81567 | 10970                          | 230                           | charcoal                            | <i>This Study</i>  |
| SRI-10-53      | UCIAMS                  | 81568 | 10650                          | 230                           | Charred Spherule (fungal sclerotia) | <i>This Study</i>  |
| SRI-10-56      | UCIAMS                  | 84947 | 11095                          | 30                            | charred coprolites                  | <i>This Study</i>  |
| SRI-10-56      | UCIAMS                  | 84946 | 11035                          | 30                            | charred twigs                       | <i>This Study</i>  |
| SRI-10-59      | UCIAMS                  | 81569 | 10820                          | 180                           | charcoal                            | <i>This Study</i>  |
| SRI-10-62      | UCIAMS                  | 84949 | 11030                          | 30                            | charred twigs                       | <i>This Study</i>  |
| SRI-10-63      | UCIAMS                  | 84950 | 11755                          | 30                            | charred coprolites                  | <i>This Study</i>  |
| SRI-10-63      | UCIAMS                  | 84951 | 11005                          | 25                            | charcoal                            | <i>This Study</i>  |

|            |        |       |       |    |                                   |                   |
|------------|--------|-------|-------|----|-----------------------------------|-------------------|
| SRI-10-65  | UCIAMS | 81571 | 11405 | 30 | charcoal                          | <i>This Study</i> |
| SRI-10-7   | UCIAMS | 84936 | 10875 | 30 | charred twigs                     | <i>This Study</i> |
| SRI-10-73  | UCIAMS | 84952 | 10620 | 20 | charcoal                          | <i>This Study</i> |
| SRI-10-78  | UCIAMS | 84953 | 11900 | 60 | charred twigs                     | <i>This Study</i> |
| SRI-10-82  | UCIAMS | 84954 | 11910 | 40 | charred coprolites                | <i>This Study</i> |
| SRI-10-86b | UCIAMS | 84962 | 11695 | 25 | charred twigs                     | <i>This Study</i> |
| SRI-10-86b | UCIAMS | 84963 | 11415 | 30 | charred coprolites                | <i>This Study</i> |
| SRI-10-91  | UCIAMS | 84955 | 11005 | 25 | charcoal                          | <i>This Study</i> |
| SRI-10-93  | UCIAMS | 84956 | 11135 | 25 | charred twigs and wood (combined) | <i>This Study</i> |
| SRI-10-94  | UCIAMS | 84957 | 11090 | 25 | charcoal                          | <i>This Study</i> |
| SRI-10-99  | UCIAMS | 84958 | 10535 | 20 | charcoal                          | <i>This Study</i> |
| SRI-13-11  | OxA    | 29224 | 11130 | 50 | small charred axis                | <i>This Study</i> |
| SRI-13-11  | OxA    | 29225 | 11085 | 50 | small charred axis                | <i>This Study</i> |
| SRI-13-25  | OxA    | 31852 | 11240 | 45 | small charred axis                | <i>This Study</i> |
| SRI-09-19  | UCIAMS | 66948 | 11230 | 30 | charcoal                          | <i>This Study</i> |
| SRI-09-23  | UCIAMS | 66949 | 11765 | 25 | charcoal                          | <i>This Study</i> |
| SRI-09-29c | UCIAMS | 66951 | 11625 | 25 | charcoal                          | <i>This Study</i> |

**SI Table 2 – Location of Sites\***

| <b>Canyon</b> | <b>Site Number</b> | <b>UTM Northing</b> | <b>UTM Easting</b> |
|---------------|--------------------|---------------------|--------------------|
| Arlington     | I                  | 762.445             | 3764.541           |
| Arlington     | II                 | 762.429             | 3764.655           |
| Arlington     | III                | 762.528             | 3764.547           |
| Arlington     | V                  | 761.68              | 3765.41            |
| Arlington     | VI                 | 761.255             | 3765.749           |
| Arlington     | VII                | 761.41              | 3765.54            |
| Arlington     | VIII               | 762.406             | 3764.8             |

**\*Note:** Universal Transverse Mercator easting and northing coordinates (km), Zone 11. NAD27 (North American Datum 1927).

SI Fig 1 – Example of Sedimentary section (I<sub>o</sub>) with charcoal rich layers shown (see Fig. 2 for key). Note: at approximate depths.

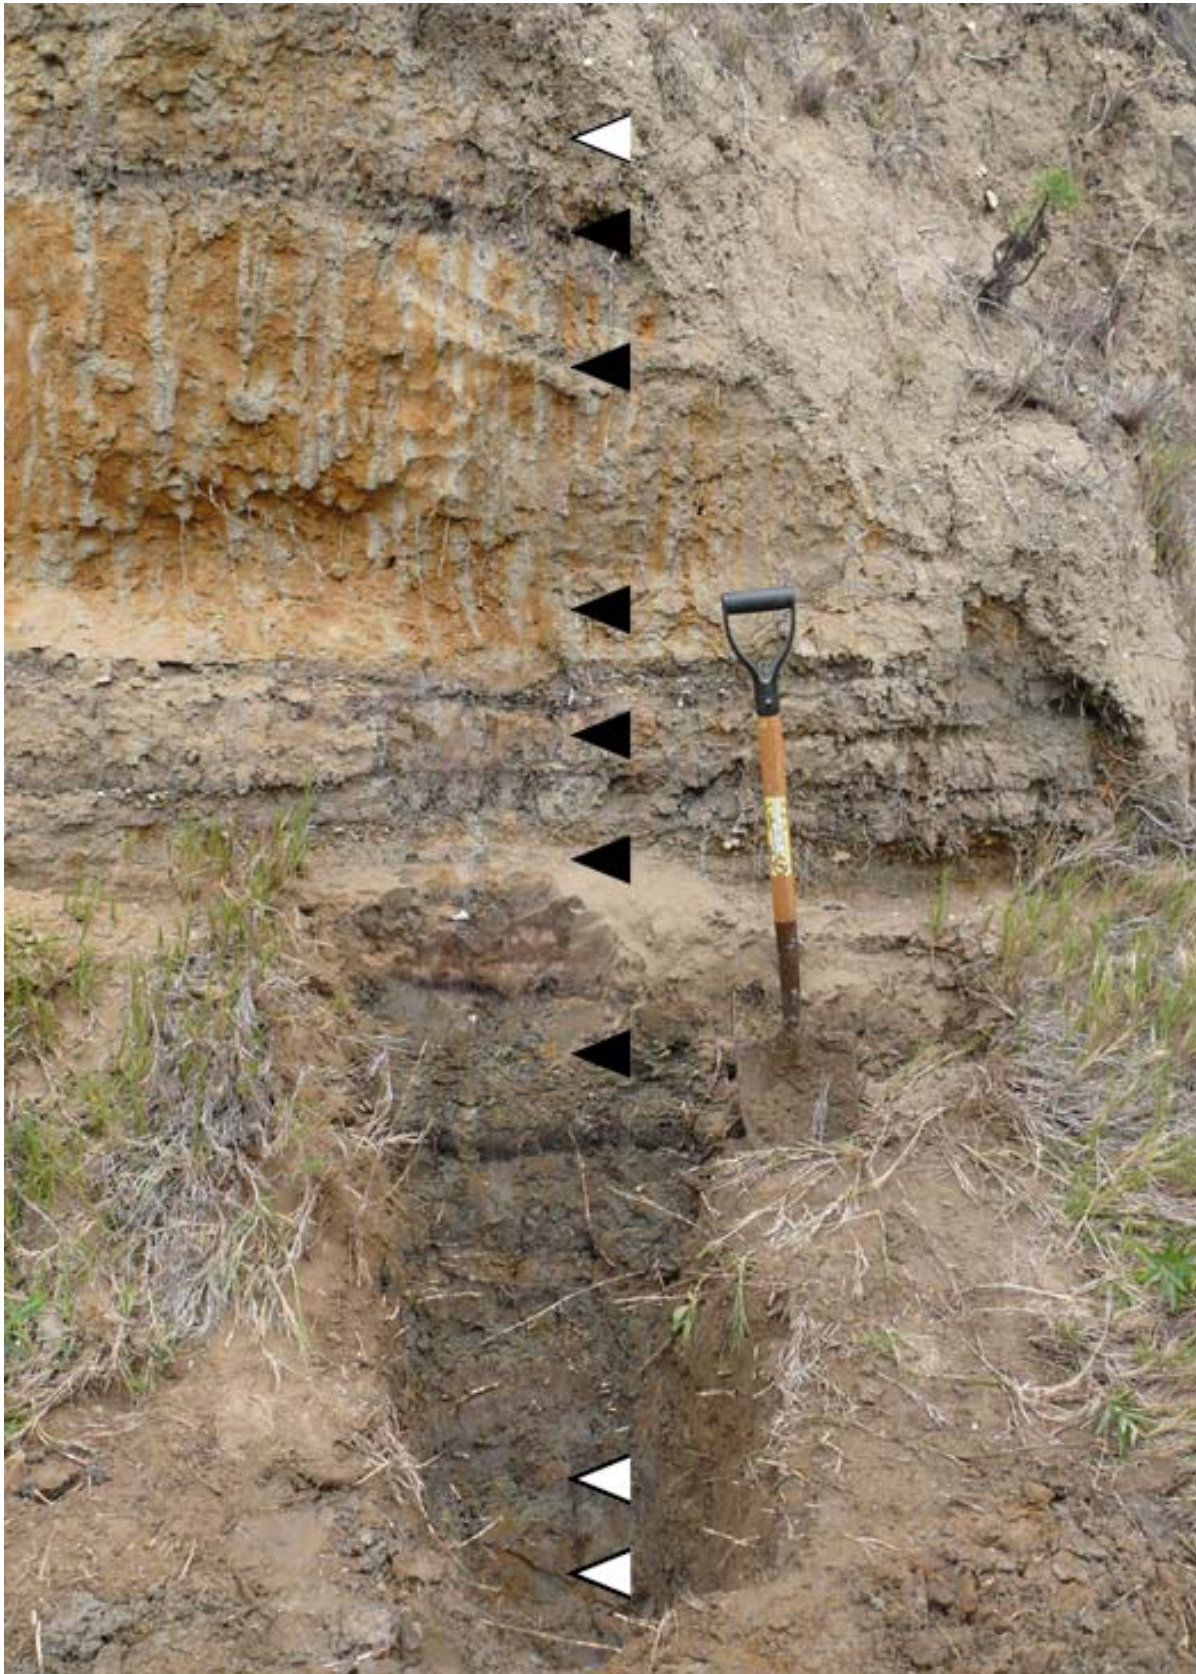

## REFERENCES

Scott AC, Pinter N, Collinson ME, Hardiman M, Anderson RS, Brain APR, Smith SY, Marone F, Stampanoni M. 2010. Fungus, not comet or catastrophe, accounts for carbonaceous spherules in the Younger Dryas “impact layer”. *Geophysical Research Letters* **37**, L14302.
